# Supplementary material for: Ocelot (Leopardus pardalis) Density in Central Amazonia
Source: PubMed Central journal article supplement (PMC4871438; doi:10.1371/journal.pone.0154624), 2016-05-18
Supplement: pone.0154624.s002.pdf [file pone.0154624.s002.pdf]

# Ocelot (*Leopardus pardalis*) density in Central Amazonia

Daniel G. Rocha, Rahel Sollmann, Emiliano E. Ramalho, Renata Ilha, Cedric K. W. Tan

## S2 File – Data File

```
#####  
###                               DATA FILE                               ###  
#####
```

### NON-SPATIAL CAPTURE RECAPTURE DATA

## CAPTURE HISTORY FILES (for CAPTURE2)

# 2013

TITLE='Ocelot\_Amana\_2013\_collaps5'

TASK READ CAPTURES X matrix OCCASIONS=8 CAPTURES=8

FORMAT='(8x,a3,1x,8f1.0)'

READ INPUT DATA

RAM 13 THA 10000000

RAM 13 ALI 10000000

RAM 13 GUI 01000001

RAM 13 DIO 01000010

RAM 13 DA5 01000000

RAM 13 DM1 01000000

RAM 13 PED 01000011

RAM 13 DM2 00100001

RAM 13 MOD 00100100

RAM 13 DM3 00010001

RAM 13 GAB 00010000

RAM 13 RAC 00010000

RAM 13 ARI 00010000

RAM 13 FLA 00001000

RAM 13 BOB 00000100

RAM 13 DF1 00000100

RAM 13 LAI 00000100

RAM 13 TAY 00000010

RAM 13 MAR 00000010

TASK POPULATION ESTIMATE JACKKN MH-CHA

# 2014

TITLE='Ocelot\_Amana\_2014\_collaps5'

TASK READ CAPTURES X matrix OCCASIONS=12 CAPTURES=12

FORMAT='(8x,a3,1x,12f1.0)'

READ INPUT DATA

RAM 14 GAB 100000000000  
RAM 14 ALI 100000000000  
RAM 14 LOU 100100000000  
RAM 14 THY 010000000001  
RAM 14 DIO 010000000000  
RAM 14 SET 010000100000  
RAM 14 DA1 010000010000  
RAM 14 ANA 010000000000  
RAM 14 PAT 010000000000  
RAM 14 TAN 001000000000  
RAM 14 THA 001000000000  
RAM 14 RAF 001000000000  
RAM 14 KEL 001000000000  
RAM 14 LEO 000100000000  
RAM 14 DA4 000100000000  
RAM 14 SAM 000100000000  
RAM 14 MAR 000100000000  
RAM 14 NAT 000010000000  
RAM 14 LIB 000001000000  
RAM 14 VII 000001001000  
RAM 14 BIR 000001000000  
RAM 14 TAY 000001011100  
RAM 14 JUA 000001000000  
RAM 14 KAM 000001000000  
RAM 14 ROD 000001000000  
RAM 14 LAB 000000100000  
RAM 14 PED 000000010000  
RAM 14 DEB 000000010000  
RAM 14 RAS 000000010000  
RAM 14 DA3 000000010000

TASK POPULATION ESTIMATE JACKKN MH-CHA

# 2015

TITLE='Ocelot Amana 2015\_collaps5'

TASK READ CAPTURES X matrix OCCASIONS=9 CAPTURES=9

FORMAT='{8x,a3,1x,9f1.0}'

READ INPUT DATA

RAM 15 RF1 100000000  
RAM 15 DIO 100000000  
RAM 15 RM2 100000000  
RAM 15 RM9 100000000  
RAM 15 M10 001000000  
RAM 15 RM1 001000100  
RAM 15 PED 000110000  
RAM 15 RF2 000100000  
RAM 15 RM7 000010000

RAM 15 RF5 000010000  
RAM 15 RF6 000001000  
RAM 15 RM5 000000100  
RAM 15 RF3 000000100  
RAM 15 THA 000000100  
RAM 15 RM8 000000010  
RAM 15 BIR 000000010  
RAM 15 RF4 000000001  
TASK POPULATION ESTIMATE JACKKN MH-CHA

### SPATIAL CAPTURE-RECAPTURE DATA

## CAPTURE HISTORY FILE

# 3013-2014-2105

| #Session | ID  | Occasion | Detector | Sex |
|----------|-----|----------|----------|-----|
| 2013     | THA | 5        | 23       | m   |
| 2013     | ALI | 7        | 17       | f   |
| 2013     | GUI | 12       | 5        | m   |
| 2013     | FLA | 28       | 9        | m   |
| 2013     | TAY | 37       | 17       | f   |
| 2013     | GUI | 39       | 1        | m   |
| 2013     | DIO | 46       | 29       | m   |
| 2013     | A5  | 49       | 46       | NA  |
| 2013     | M1  | 50       | 41       | m   |
| 2013     | PED | 50       | 41       | m   |
| 2013     | M2  | 51       | 43       | m   |
| 2013     | M3  | 54       | 31       | m   |
| 2013     | MOD | 56       | 41       | m   |
| 2013     | RAC | 58       | 40       | f   |
| 2013     | GAB | 58       | 45       | f   |
| 2013     | ARI | 61       | 47       | f   |
| 2013     | BOB | 66       | 32       | m   |
| 2013     | MOD | 67       | 40       | m   |
| 2013     | LAI | 67       | 16       | f   |
| 2013     | F1  | 68       | 40       | f   |
| 2013     | DIO | 73       | 38       | m   |
| 2013     | MAR | 73       | 43       | f   |
| 2013     | PED | 74       | 41       | m   |
| 2013     | PED | 78       | 41       | m   |
| 2013     | M2  | 80       | 37       | m   |
| 2013     | M3  | 81       | 35       | m   |
| 2014     | A1  | 10       | 17       | NA  |
| 2014     | A1  | 36       | 17       | NA  |
| 2014     | A3  | 92       | 20       | NA  |

|      |      |     |     |    |
|------|------|-----|-----|----|
| 2014 | A4   | 19  | 26  | NA |
| 2014 | ALI  | 33  | 111 | f  |
| 2014 | ANA  | 60  | 31  | f  |
| 2014 | BIR  | 84  | 46  | m  |
| 2014 | DEB  | 39  | 12  | f  |
| 2014 | DIO  | 65  | 110 | m  |
| 2014 | GAB  | 57  | 40  | f  |
| 2014 | JUA  | 80  | 20  | f  |
| 2014 | KAM  | 87  | 109 | f  |
| 2014 | KEL  | 68  | 42  | f  |
| 2014 | LAB  | 89  | 114 | m  |
| 2014 | LEO  | 20  | 7   | m  |
| 2014 | LIB  | 78  | 32  | f  |
| 2014 | LOU  | 62  | 46  | f  |
| 2014 | LOU  | 75  | 45  | f  |
| 2014 | MAR  | 72  | 36  | f  |
| 2014 | NAT  | 76  | 28  | f  |
| 2014 | PAT  | 14  | 6   | m  |
| 2014 | PED  | 89  | 37  | m  |
| 2014 | RAF  | 14  | 9   | m  |
| 2014 | RAS  | 43  | 33  | m  |
| 2014 | ROD  | 34  | 13  | m  |
| 2014 | SAM  | 19  | 5   | m  |
| 2014 | SET  | 62  | 41  | f  |
| 2014 | SET  | 85  | 41  | f  |
| 2014 | TAN  | 68  | 35  | f  |
| 2014 | THA  | 13  | 18  | m  |
| 2014 | TAY  | 28  | 17  | f  |
| 2014 | TAY  | 40  | 17  | f  |
| 2014 | TAY  | 43  | 17  | f  |
| 2014 | TAY  | 48  | 17  | f  |
| 2014 | TAY  | 49  | 17  | f  |
| 2014 | THY  | 64  | 111 | m  |
| 2014 | THY  | 116 | 111 | m  |
| 2014 | VII  | 78  | 32  | f  |
| 2014 | VII  | 95  | 32  | f  |
| 2015 | RF1  | 4   | 2   | f  |
| 2015 | RF2  | 18  | 4   | f  |
| 2015 | RF3  | 34  | 11  | f  |
| 2015 | RF4  | 89  | 29  | f  |
| 2015 | RF5  | 71  | 32  | f  |
| 2015 | RF6  | 30  | 33  | f  |
| 2015 | RM1  | 33  | 2   | m  |
| 2015 | RM1  | 59  | 29  | m  |
| 2015 | RM10 | 53  | 41  | m  |
| 2015 | BIR  | 79  | 50  | m  |
